# Supplementary material for: Efficient Decellularization of the Full-Thickness Rat-Derived Abdominal Wall to Produce Acellular Biologic Scaffolds for Tissue Reconstruction: Promising Evidence Acquired from In Vitro Results
Source: MDPI journal article supplement (doi:10.3390/bioengineering10080913), 2023-08-01
Supplement: s1 [file s1]

## Supplementary Materials

**Table S1.** DNA quantification and biochemical analysis including the determination of the hydroxyproline and sGAG content of non-decellularized and decellularized samples. Statistically significant differences regarding the DNA content ( $p < 0.001$ ), hydroxyproline content ( $p = 0.021$ ) and sGAGs ( $p < 0.001$ ) were observed between non-decellularized and decellularized samples.

|                                     | Non-decel | Decel Cycle 1 | Decel Cycle 2 | Decel Cycle 3 | <i>p value</i> |
|-------------------------------------|-----------|---------------|---------------|---------------|----------------|
| DNA (ng /mg dry tissue)             | 1363 ± 87 | 542 ± 73      | 167 ± 35      | 48 ± 12       | <0.001         |
| Hydroxyproline (µg / mg dry tissue) | 26 ± 5    | 22 ± 4        | 20 ± 3        | 20 ± 2        | 0.021          |
| sGAGs (µg / mg dry tissue)          | 9.1 ± 1.7 | 5.3 ± 1.7     | 2.1 ± 0.6     | 1.1 ± 0.3     | <0.001         |
